# Supplementary material
Source: PubMed Central journal article supplement (PMC5711330)

SUPPLEMENTARY DATA

Hypoglycemia Risk Factors

Supplementary Table S1. Hazard Ratios from Interactions by Race for Traditional Risk Factors of Severe Hypoglycemia, n=1206.

|                                                            | Model 1*              |                        |               | Model 2*              |                       |           |
|------------------------------------------------------------|-----------------------|------------------------|---------------|-----------------------|-----------------------|-----------|
|                                                            | Black<br>HR (95% CI)  | White<br>HR (95% CI)   | p-<br>value** | Black<br>HR (95% CI)  | White<br>HR (95% CI)  | p-value** |
| Age,<br>per 5 years                                        | 1.38<br>(1.15 – 1.67) | 1.48<br>(1.23 – 1.77)  | 0.63          | 1.22<br>(1.00 – 1.47) | 1.28<br>(1.05 – 1.55) | 0.72      |
| Sex                                                        | 0.90<br>(0.56 – 1.47) | 0.97<br>(0.66 – 1.43)  | 0.82          | 1.14<br>(0.70 – 1.86) | 1.02<br>(0.69 – 1.52) | 0.73      |
| Obese***                                                   | 1.74<br>(1.07 – 2.82) | 1.31<br>(0.88 – 1.94)  | 0.36          | 1.61<br>(0.99 – 2.61) | 1.15<br>(0.77 – 1.71) | 0.29      |
| Fructosamine<br>Middle tertile                             | 3.15<br>(1.28 – 7.73) | 2.14<br>(1.26 – 3.66)  | <0.0001       | 2.71<br>(1.10 – 6.68) | 1.55<br>(0.90 – 2.67) | 0.21      |
| Highest tertile                                            | 6.05<br>(2.60 – 14.1) | 3.16<br>(1.87 – 5.32)  |               | 4.38<br>(1.87 – 10.3) | 1.89<br>(1.10 – 3.26) |           |
| Diabetes duration ≥9 years                                 | 1.58<br>(1.02 – 2.46) | 1.92<br>(1.29 – 2.84)  | 0.52          | 1.14<br>(0.72 – 1.81) | 1.19<br>(0.78 – 1.82) | 0.88      |
| Diabetes Medications<br>Oral only                          | 2.09<br>(0.99 – 4.38) | 4.04<br>(1.91 – 8.50)  | <0.0001       | 1.62<br>(0.77 – 3.44) | 2.88<br>(1.35 – 6.15) | 0.43      |
| Any Insulin use                                            | 3.07<br>(1.49 – 6.31) | 9.11<br>(4.26 – 19.46) |               | 2.10<br>(1.00 – 4.38) | 4.24<br>(1.90 – 9.46) |           |
| eGFR <60 mL/min/1.73 m <sup>2</sup>                        | 1.92<br>(1.07 – 3.44) | 2.07<br>(1.23 – 3.48)  | 0.84          | 1.44<br>(0.79 – 2.65) | 1.36<br>(0.79 – 2.34) | 0.89      |
| Albumin to Creatinine Ratio<br>30 – < 300mg/g              | 1.13<br>(0.60 – 2.10) | 1.94<br>(1.17 – 3.23)  | <0.0001       | 0.88<br>(0.47 – 1.64) | 1.48<br>(0.89 – 2.48) | 0.39      |
| ≥300mg/g                                                   | 2.28<br>(1.24 – 4.17) | 4.34<br>(2.39 – 7.88)  |               | 1.68<br>(0.90 – 3.14) | 2.26<br>(1.21 – 4.23) |           |
| DSST****, per 1 lower race-<br>specific standard deviation | 1.69<br>(1.32 – 2.18) | 1.68<br>(1.38 – 2.04)  | 0.96          | 1.58<br>(1.22 – 2.04) | 1.58<br>(1.29 – 1.93) | 0.99      |

## SUPPLEMENTARY DATA

\*Model 1 included age and sex. Model 2 included all variables in Model 1 plus all covariates listed in the table. \*\*P-value for interaction from a model with only that variable's interaction terms in the model. \*\*\*Overweight and normal weight were collapsed into one reference group due to small numbers of normal weight participants.

\*\*\*\*DSST: Digit Symbol Substitution Test

SUPPLEMENTARY DATA

**Supplementary Table S2. Hazard Ratios and 95% Confidence Intervals for Non-Traditional Risk Factors for Hypoglycemia (n=1144, 169 people with hypoglycemia, numerical table of results from Figure 2)**

|                                   | <b>Model 1<br/>HR (95% CI)</b> | <b>Model 2<br/>HR (95% CI)</b> |
|-----------------------------------|--------------------------------|--------------------------------|
| <b><i>Disability</i></b>          |                                |                                |
| Any ADL difficulty                | 2.15 (1.57, 2.95)              | 1.95 (1.41, 2.69)              |
| Any IADL difficulty               | 1.63 (1.18, 2.25)              | 1.37 (0.99, 1.90)              |
| Number of ADLs/IADLs (ref=0)      |                                |                                |
| 1 ADL/IADL                        | 1.16 (0.76, 1.78)              | 1.03 (0.67, 1.58)              |
| 2 ADLs/IADLs                      | 1.67 (1.03, 2.72)              | 1.48 (0.91, 2.42)              |
| 3+ ADLs/IADLs                     | 2.89 (1.94, 4.30)              | 2.17 (1.44, 3.28)              |
| <b><i>General Health</i></b>      |                                |                                |
| Poor/fair self-rated health       | 1.46 (1.06, 1.99)              | 1.08 (0.78, 1.49)              |
| Unintentional weight loss         | 1.47 (0.89, 2.44)              | 1.17 (0.70, 1.95)              |
| Prevalent CHD                     | 1.91 (1.31, 2.78)              | 1.42 (0.94, 2.13)              |
| Prevalent stroke                  | 1.54 (0.78, 3.01)              | 1.17 (0.59, 2.33)              |
| Number of comorbidities (ref=0)   |                                |                                |
| 1 comorbidity                     | 1.41 (0.97, 2.06)              | 1.28 (0.87, 1.89)              |
| 2 comorbidities                   | 1.58 (0.99, 2.52)              | 1.15 (0.71, 1.87)              |
| 3+ comorbidities                  | 2.75 (1.60, 4.71)              | 1.73 (0.99, 3.05)              |
| <b><i>Biomarkers</i></b>          |                                |                                |
| 1,5-AG, per 5ug/mL                | 1.47 (1.30, 1.66)              | 1.22 (1.05, 1.41)              |
| NT-proBNP, per log-transformed SD | 1.39 (1.18, 1.65)              | 1.17 (0.98, 1.39)              |
| hs-cTnT, per log-transformed SD   | 1.55 (1.33, 1.80)              | 1.09 (0.90, 1.32)              |
| hsCRP, per log-transformed SD     | 1.06 (0.90, 1.24)              | 0.89 (0.75, 1.07)              |
| <b><i>Medications</i></b>         |                                |                                |
| Beta-Blockers                     | 0.95 (0.60-8.82)               | 0.95 (0.59-1.52)               |
| Anti-Depressants                  | 1.78 (1.08-2.93)               | 1.83 (1.11-3.04)               |
| <b><i>Demographics</i></b>        |                                |                                |
| Family history of diabetes        | 1.28 (0.92, 1.78)              | 1.20 (0.86, 1.68)              |
| Medicaid insurance                | 2.09 (1.41, 3.10)              | 1.70 (1.14, 2.53)              |
| Education (ref = some college)    |                                |                                |
| High school graduate              | 1.29 (0.86, 1.95)              | 1.10 (0.72, 1.67)              |
| Less than high school graduate    | 2.01 (1.33, 3.04)              | 1.33 (0.85, 2.08)              |

SUPPLEMENTARY DATA

**Supplementary Table S3. Baseline Characteristics of Black and White ARIC Study Participants Aged 65 and Over with Diagnosed Diabetes and CMS Fee-For-Service Part B Coverage (Visit 4, 1996-1998)**

|                                      | <b>Overall<br/>(n=463)</b>    | <b>Blacks<br/>(n=139)</b>     | <b>Whites<br/>(n=324)</b>     |
|--------------------------------------|-------------------------------|-------------------------------|-------------------------------|
|                                      | <b>Mean (SD)<br/>or n (%)</b> | <b>Mean (SD)<br/>or n (%)</b> | <b>Mean (SD)<br/>or n (%)</b> |
| Age                                  | 69.0 (2.53)                   | 68.9 (2.65)                   | 69.0 (2.48)                   |
| Female sex                           | 242 (52.3)                    | 101 (72.7)                    | 141 (43.5)                    |
| BMI                                  |                               |                               |                               |
| Overweight, %                        | 176 (38.0)                    | 48 (34.5)                     | 128 (39.5)                    |
| Obese, %                             | 236 (51.0)                    | 78 (56.1)                     | 158 (48.8)                    |
| Diabetes duration $\geq$ 9 years     | 225 (48.6)                    | 80 (57.6)                     | 145 (44.8)                    |
| Diabetes Medications                 |                               |                               |                               |
| No medication use                    | 109 (23.5)                    | 28 (20.1)                     | 81 (25.0)                     |
| Oral medication use only             | 222 (48.0)                    | 53 (38.1)                     | 169 (52.2)                    |
| Any insulin use                      | 132 (28.5)                    | 58 (41.7)                     | 74 (22.8)                     |
| Fructosamine                         |                               |                               |                               |
| Middle tertile (299-347 $\mu$ mol/L) | 154 (33.3)                    | 46 (33.1)                     | 108 (33.3)                    |
| Highest tertile (>347 $\mu$ mol/L)   | 154 (33.3)                    | 60 (43.2)                     | 94 (29.0)                     |
| eGFR <60 mL/min/1.73 m <sup>2</sup>  | 85 (18.4)                     | 29 (20.9)                     | 56 (17.3)                     |
| Albumin to Creatinine Ratio          |                               |                               |                               |
| 30 - <300mg/g                        | 71 (15.3)                     | 23 (16.7)                     | 48 (14.8)                     |
| $\geq$ 300mg/g                       | 34 (7.3)                      | 14 (10.1)                     | 20 (6.2)                      |
| Digit Symbol Substitution Test       | 34.0 (12.9)                   | 23.1 (10.2)                   | 38.7 (11.0)                   |

SUPPLEMENTARY DATA

**Supplementary Table S4. Adjusted\* Hazard Ratios and 95% Confidence Intervals for Traditional Risk Factors in ARIC Participants Aged 65 and Over with Diagnosed Diabetes and CMS Fee-For-Service Part B (n=463, 76 hypoglycemic events)**

|                                                      | <b>Model 1*</b><br><b>HR (95% CI)</b> | <b>Model 2*</b><br><b>HR (95% CI)</b> |
|------------------------------------------------------|---------------------------------------|---------------------------------------|
| Age, per 5 years                                     | 1.49 (0.95 – 2.33)                    | 1.34 (0.83 – 2.15)                    |
| Female sex                                           | 0.96 (0.60 – 1.53)                    | 1.07 (0.66 – 1.72)                    |
| Black race                                           | 2.00 (1.25 – 3.21)                    | 1.48 (0.91 – 2.40)                    |
| Obese                                                | 1.44 (0.90 – 2.31)                    | 1.22 (0.75 – 1.98)                    |
| Fructosamine (vs. lowest tertile)                    |                                       |                                       |
| Middle tertile (299-347 $\mu\text{mol/L}$ )          | 1.38 (0.71 – 2.66)                    | 1.06 (0.54 – 2.09)                    |
| Highest tertile (>347 $\mu\text{mol/L}$ )            | 2.63 (1.44 – 4.83)                    | 1.68 (0.90 – 3.14)                    |
| Diabetes duration $\geq 9$ years                     | 1.86 (1.15 – 2.99)                    | 1.15 (0.68 – 1.93)                    |
| Diabetes Medication (vs. none)                       |                                       |                                       |
| Oral only                                            | 2.40 (0.99 – 5.77)                    | 2.27 (0.92 – 5.61)                    |
| Any insulin use                                      | 6.18 (2.59 – 14.72)                   | 4.72 (1.92 – 11.63)                   |
| eGFR <60 mL/min/1.73 m <sup>2</sup>                  | 2.32 (1.38 – 3.89)                    | 1.92 (1.09 – 3.40)                    |
| Albumin to Creatinine Ratio                          |                                       |                                       |
| 30 – <300 mg/g                                       | 1.17 (0.59 – 2.31)                    | 0.74 (0.36 – 1.52)                    |
| $\geq 300$ mg/g                                      | 4.01 (2.10 – 7.68)                    | 2.97 (1.49 – 5.89)                    |
| DSST**, per 1 lower race-specific standard deviation | 1.66 (1.30 – 2.13)                    | 1.55 (1.21 – 1.99)                    |

\*Model 1 included age, sex, and race. Model 2 included all variables in Model 1 plus all covariates listed in the table.

\*\*DSST: Digit Symbol Substitution Test

SUPPLEMENTARY DATA

**Supplementary Table S5. Hazard Ratios and 95% Confidence Intervals for Traditional Risk Factors in ARIC Participants with Diagnosed Diabetes, excluding individuals with insulin only use at all four study visits (possible type 1) (n=1138, 158 hypoglycemic events)**

|                                                      | <b>Model 1*</b><br>HR (95% CI) | <b>Model 2*</b><br>HR (95% CI) |
|------------------------------------------------------|--------------------------------|--------------------------------|
| Age, per 5 years                                     | 1.39 (1.21 – 1.61)             | 1.26 (1.08 – 1.47)             |
| Female sex                                           | 0.95 (0.69 – 1.32)             | 0.98 (0.70 – 1.37)             |
| Black race                                           | 1.76 (1.27 – 2.45)             | 1.31 (0.94 – 1.84)             |
| Obese                                                | 1.67 (1.20 – 2.33)             | 1.62 (1.15 – 2.15)             |
| Fructosamine (vs. lowest tertile)                    |                                |                                |
| Middle tertile (296-350 $\mu\text{mol/L}$ )          | 1.91 (1.19 – 3.06)             | 1.54 (0.95 – 2.50)             |
| Highest tertile (>350 $\mu\text{mol/L}$ )            | 3.83 (2.47 – 5.94)             | 2.67 (1.69 – 4.21)             |
| Diabetes duration $\geq 9$ years                     | 1.47 (1.07 – 2.01)             | 1.14 (0.82 – 1.61)             |
| Diabetes Medications (vs. none)                      |                                |                                |
| Oral only                                            | 3.02 (1.79 – 5.09)             | 2.14 (1.25 – 3.67)             |
| Any insulin use                                      | 4.58 (2.65 – 7.93)             | 2.66 (1.49 – 4.73)             |
| eGFR <60 mL/min/1.73 m <sup>2</sup>                  | 1.98 (1.28 – 3.08)             | 1.57 (0.99 – 2.51)             |
| Albumin to Creatinine Ratio                          |                                |                                |
| 30 – <300mg/g                                        | 1.75 (1.16 – 2.62)             | 1.43 (0.95 – 2.15)             |
| $\geq 300\text{mg/g}$                                | 3.16 (1.91 – 5.23)             | 2.26 (1.33 – 3.85)             |
| DSST**, per 1 lower race-specific standard deviation | 1.64 (1.38 – 1.94)             | 1.55 (1.30 – 1.84)             |

\*Model 1 included age, sex, and race. Model 2 included all variables in Model 1 plus all covariates listed in the table.

\*\* DSST: Digit Symbol Substitution Test

SUPPLEMENTARY DATA

**Supplementary Figure S1. Hazard Ratios and 95% Confidence Intervals for Liver Enzymes for Severe Hypoglycemia (n =1144, 169 people with hypoglycemia)**

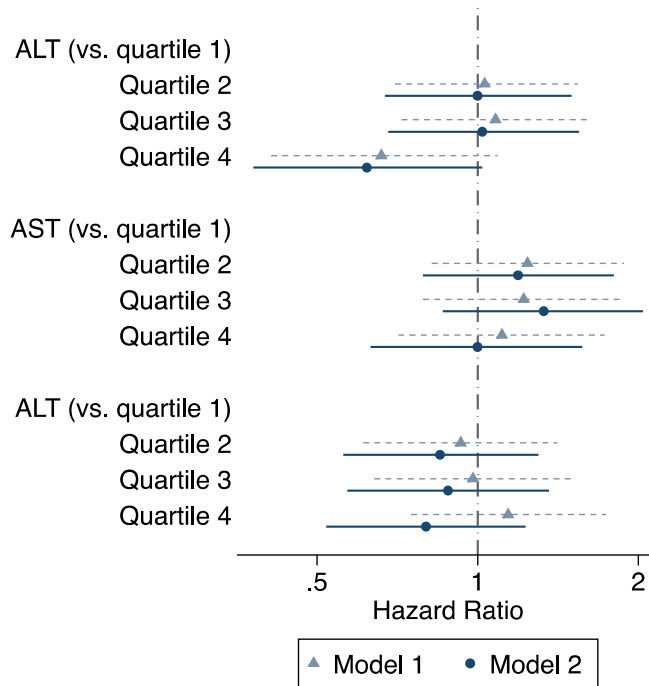

Quartiles of ALT were quartile 1: 1-10U/L, quartile 2: 11-14U/L, quartile 3: 15-19U/L, quartile 4:  $\geq 20$ U/L. Quartiles of AST were quartile 1: 5-14U/L, quartile 2: 15-17U/L, quartile 3: 18-21U/L, quartile 4:  $\geq 22$ U/L. Quartiles of GGT were quartile 1: 1-19U/L, quartile 2: 20-27U/L, quartile 3: 28-40U/L, quartile 4:  $\geq 41$ U/L. Model 1 was adjusted for age, sex, and race. Model 2 was adjusted for all traditional risk factors (age, sex, race, obesity, fructosamine tertiles, diabetes duration  $\geq 9$  years, diabetes medication use (no medication, oral only, any insulin), eGFR  $< 60$  mL/min/1.73 m<sup>2</sup>, albuminuria ( $< 30$ mg/g, 30- $< 300$ mg/g,  $\geq 300$  mg/g), DSST race-specific z-score).

SUPPLEMENTARY DATA

**Supplementary Figure S2. Hazard Ratios and 95% Confidence Intervals for Novel Risk Factors for Hypoglycemia in ARIC Participants Aged 65 and Over with Diagnosed Diabetes and CMS Fee-For-Service Part B (n=429, 67 hypoglycemic events)**

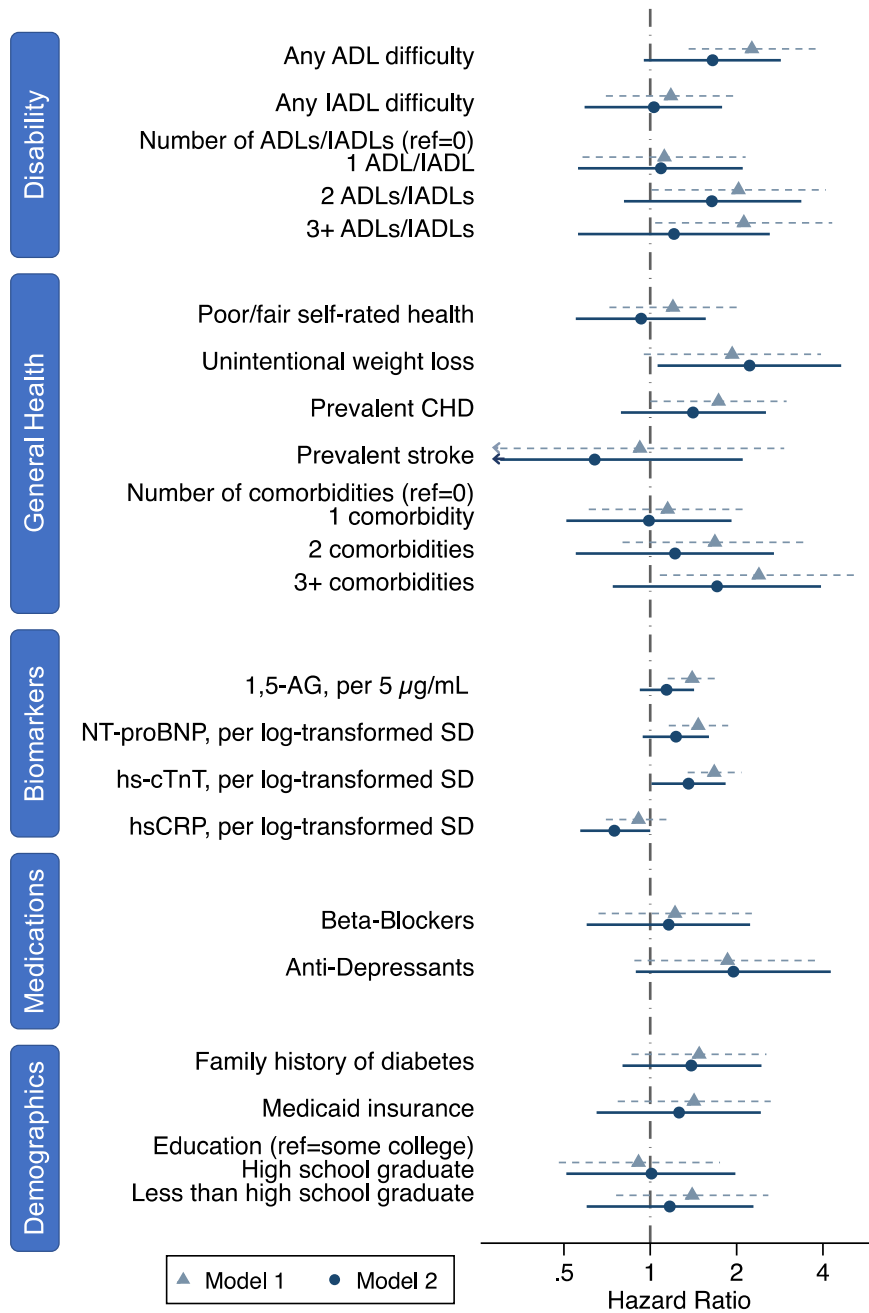

Fully adjusted models were adjusted for all traditional risk factors (age, sex, race, obesity, fructosamine tertiles, diabetes duration  $\geq 9$  years, diabetes medication use (no medication, oral only, any insulin), eGFR  $< 60$  mL/min/1.73 m<sup>2</sup>, albuminuria ( $< 30$ mg/g,  $30$ - $< 300$ mg/g,  $\geq 300$  mg/g), DSST race-specific z-score).



SUPPLEMENTARY DATA

**Supplementary Figure S3. Incidence Rate of Severe Hypoglycemia among ARIC Participants Aged 65 and Over with Diagnosed Diabetes and CMS Fee-For-Service Part B, Adjusted for Sex.**

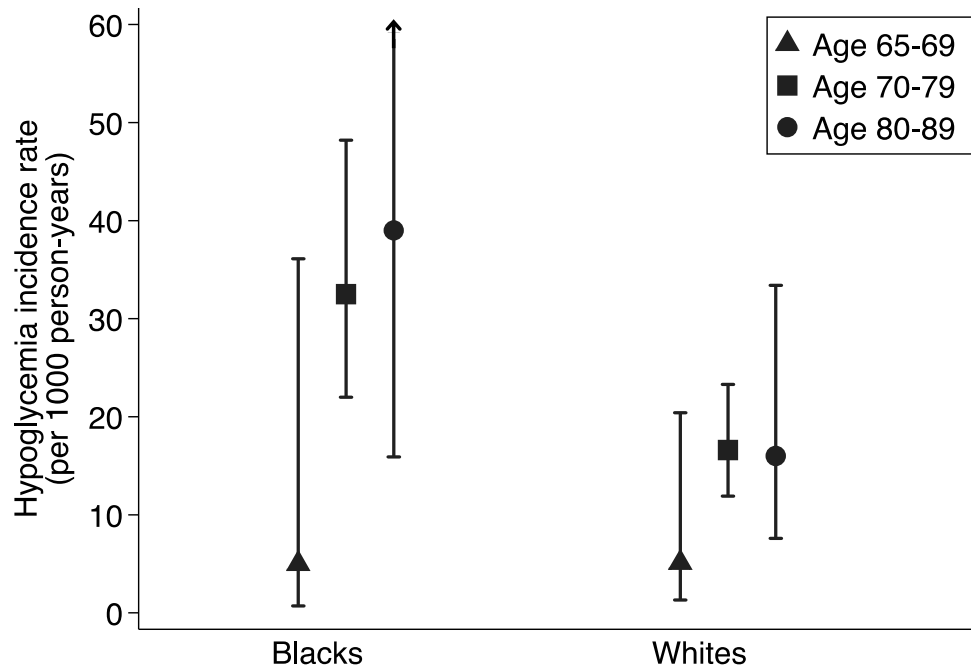

Supplement: DC170819SupplementaryData.pdf [file DC170819SupplementaryData.pdf]
